# Supplementary material for: In Vitro Study of Human Immune Responses to Hyaluronic Acid Hydrogels, Recombinant Spidroins and Human Neural Progenitor Cells of Relevance to Spinal Cord Injury Repair
Source: MDPI journal article supplement (doi:10.3390/cells10071713), 2021-07-06
Supplement: s1 [file s1]

Table S1. Antibodies applied in the activation assay.

| <b>Antibody-Fluorochrome</b> | <b>Clone</b>                            | <b>Manufacture</b> |
|------------------------------|-----------------------------------------|--------------------|
| CD11c-FITC                   | KB90                                    | Dako Cytomation    |
| CD86-APC                     | 2331 (FUN-1)                            | BD Biosciences     |
| CD16-Alexa700                | 3G2                                     | BD Biosciences     |
| Live/Dead                    | Live/Dead Fixable near-IR Dead cell kit | Invitrogen         |
| 4-1BB-BV421                  | 4B4-1                                   | BioLegend          |
| CD15-BV510                   | W6D3                                    | BioLegend          |
| HLA-DR-BV570                 | L243                                    | BioLegend          |
| CD56-BV711                   | HCD56                                   | BioLegend          |
| CD4-BV750                    | SK3                                     | BioLegend          |
| CD69-ECD                     | TP1.55.3                                | Coulter            |
| CD3-PE-Cy5                   | UCHT1                                   | BD Biosciences     |
| CD14-PE-Cy5.5                | RMO52                                   | Beckman Coulter    |
| CD8-BUV395                   | RPA-T8                                  | BD Biosciences     |
| CD19-BUV737                  | SJ25C1                                  | BD Biosciences     |
